# Supplementary material for: Cell-Free DNA Variant Sequencing Using Plasma and AR-V7 Testing of Circulating Tumor Cells in Prostate Cancer Patients
Source: Cells. 2021 Nov 18;10(11):3223. doi: 10.3390/cells10113223 (PMC8620951; doi:10.3390/cells10113223)
Supplement: Supplementary file 1 [file cells-10-03223-s001.zip › cells-1446836-Suppl. Table 2 and 3.pdf]

# Supplemental Tables 2 and 3

## Cell-free DNA variant sequencing using plasma and AR-V7 testing of CTCs in prostate cancer patients

Verena Lieb<sup>1,2</sup>, Amer Abdulrahman<sup>1,2</sup>, Katrin Weigelt<sup>1,2</sup>, Siegfried Hauch<sup>3</sup>, Michael Gombert<sup>3</sup>, Juan Guzman<sup>1,2</sup>, Laura Bellut<sup>1,2</sup>, Peter J. Goebell<sup>1,2</sup>, Robert Stöhr<sup>2,4</sup>, Arndt Hartmann<sup>2,4</sup>, Bernd Wullich<sup>1,2</sup>, Helge Taubert<sup>1,2,†,\*</sup> and Sven Wach<sup>1,2,†</sup>

**Table S2:** Detection of CTCs and AR-V7+ CTCs with the Adna-Test ProstateCancerPanel AR-V7

| Patient-<br>No. | CTC_No. | CTC             | AR-V7           | Seq. sample | CTC_No. | CTC             | AR-V7           | Seq. sample | CTC_No. | CTC  | AR-V7 | Seq. sample |
|-----------------|---------|-----------------|-----------------|-------------|---------|-----------------|-----------------|-------------|---------|------|-------|-------------|
| 1               | CTC-30  | negative        | negative        | 1           |         |                 |                 |             |         |      |       |             |
| 2               | CTC-46  | negative        | negative        | 2           |         |                 |                 |             |         |      |       |             |
| 3               | CTC-49  | negative        | negative        | 3           |         |                 |                 |             |         |      |       |             |
| 4               | CTC-54  | <b>positive</b> | <b>positive</b> | 4           |         |                 |                 |             |         |      |       |             |
| 5               | CTC-62  | negative        | negative        | 5           |         |                 |                 |             |         |      |       |             |
| 6               | CTC-63  | <b>positive</b> | <b>positive</b> | 6           | CTC-84  | <b>positive</b> | <b>positive</b> | 12          | CTC-14  | n.d. | n.d.  | 29          |
| 7               | CTC-74  | <b>positive</b> | negative        | 7           |         |                 |                 |             |         |      |       |             |
| 8               | CTC-75  | <b>positive</b> | <b>positive</b> | 8           |         |                 |                 |             |         |      |       |             |
| 9               | CTC-77  | negative        | negative        | 9           |         |                 |                 |             |         |      |       |             |
| 10              | CTC-79  | negative        | negative        | 10          |         |                 |                 |             |         |      |       |             |
| 11              | CTC-83  | <b>positive</b> | negative        | 11          |         |                 |                 |             |         |      |       |             |
| 12              | CTC-89  | <b>positive</b> | negative        | 13          | CTC-105 | negative        | negative        | 21          |         |      |       |             |
| 13              | CTC-90  | negative        | negative        | 14          |         |                 |                 |             |         |      |       |             |
| 14              | CTC-91  | negative        | negative        | 15          |         |                 |                 |             |         |      |       |             |
| 15              | CTC-92  | negative        | negative        | 16          |         |                 |                 |             |         |      |       |             |
| 16              | CTC-95  | negative        | negative        | 17          |         |                 |                 |             |         |      |       |             |

|    |         |                 |          |    |         |                 |          |    |
|----|---------|-----------------|----------|----|---------|-----------------|----------|----|
| 17 | CTC-96  | <b>positive</b> | negative | 18 |         |                 |          |    |
| 18 | CTC-99  | negative        | negative | 19 | CTC-118 | negative        | negative | 24 |
| 19 | CTC-102 | negative        | negative | 20 |         |                 |          |    |
| 20 | CTC-110 | negative        | negative | 22 |         |                 |          |    |
| 21 | CTC-115 | negative        | negative | 23 |         |                 |          |    |
| 22 | CTC-127 | negative        | negative | 25 |         |                 |          |    |
| 23 | CTC-131 | negative        | negative | 26 |         |                 |          |    |
| 24 | CTC-133 | <b>positive</b> | negative | 27 |         |                 |          |    |
| 25 | CTC-143 | negative        | negative | 28 |         |                 |          |    |
| 26 | CTC-25  | n.d.            | n.d.     | 30 |         |                 |          |    |
| 27 | CTC-129 | negative        | negative | 31 |         |                 |          |    |
| 28 | CTC-137 | negative        | negative | 32 |         |                 |          |    |
| 29 | CTC-157 | negative        | negative | 33 |         |                 |          |    |
| 30 | CTC-168 | <b>positive</b> | negative | 34 | CTC-191 | <b>positive</b> | negative | 38 |
| 31 | CTC-173 | negative        | negative | 35 |         |                 |          |    |
| 32 | CTC-178 | negative        | negative | 36 |         |                 |          |    |
| 33 | CTC-180 | negative        | negative | 37 |         |                 |          |    |
| 34 | CTC-204 | negative        | negative | 39 |         |                 |          |    |

---

Abbreviation: Seq. Sample, sequenced sample

Detection of CTCs or AR-V7-positive CTCs is marked in bold

**Table S3** Cross table: Relationship between TP53 gene variants and CTCs or AR-V7-positive CTCs

| Cross table                                              |                                    |   | CTCs |     | ARV7-positive CTCs |     | Total |
|----------------------------------------------------------|------------------------------------|---|------|-----|--------------------|-----|-------|
|                                                          |                                    |   | no   | yes | no                 | yes |       |
| TP53 gene variants<br>(pathogenic and likely pathogenic) | Group 1: without gene variants     | n | 16   | 4   | 20                 | 0   | 20    |
|                                                          | Group 2: with frameshift mutations | n | 7    | 2   | 9                  | 0   | 9     |
|                                                          | Group 3: with point mutations      | n | 3    | 5   | 4                  | 4   | 8     |
| Total                                                    |                                    | n | 26   | 11  | 33                 | 4   | 37    |
