# Supplementary material for: Cell-Free DNA Variant Sequencing Using Plasma and AR-V7 Testing of Circulating Tumor Cells in Prostate Cancer Patients
Source: Cells. 2021 Nov 18;10(11):3223. doi: 10.3390/cells10113223 (PMC8620951; doi:10.3390/cells10113223)
Supplement: Supplementary file 1 [file cells-10-03223-s001.zip › Supplemental Figures S1 and S2.pdf]

Supplemental Figures S1 and S2

## Cell-free DNA variant sequencing using plasma and AR-V7 testing of CTCs in prostate cancer patients

Verena Lieb<sup>1,2</sup>, Amer Abdulrahman<sup>1,2</sup>, Katrin Weigelt<sup>1,2</sup>, Siegfried Hauch<sup>3</sup>, Michael Gombert<sup>3</sup>, Juan Guzman<sup>1,2</sup>, Laura Bellut<sup>1,2</sup>, Peter J. Goebell<sup>1,2</sup>, Robert Stöhr<sup>2,4</sup>, Arndt Hartmann<sup>2,4</sup>, Bernd Wullich<sup>1,2</sup>, Helge Taubert<sup>1,2,†,\*</sup> and Sven Wach<sup>1,2,†</sup>

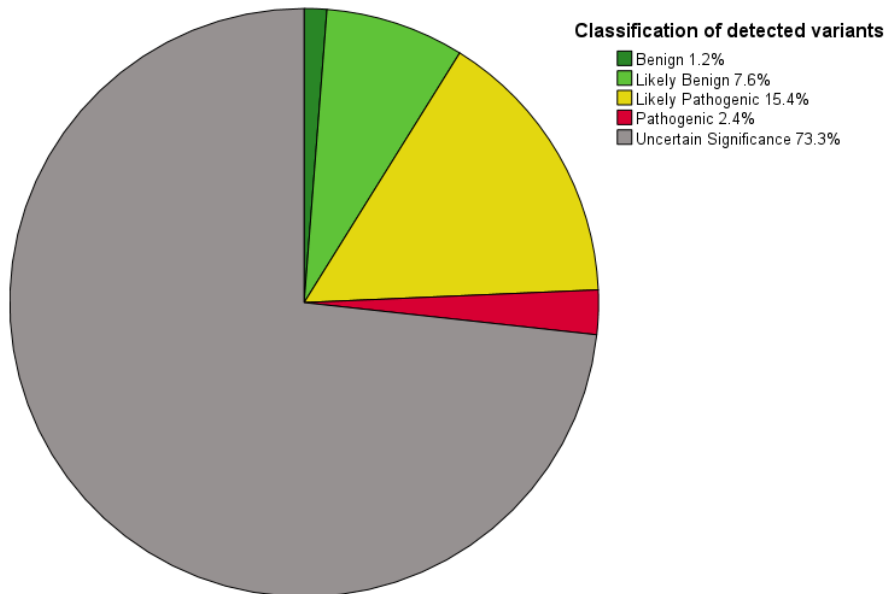

Figure S1A: Classification of called variants in cfDNA according to their known functional impact

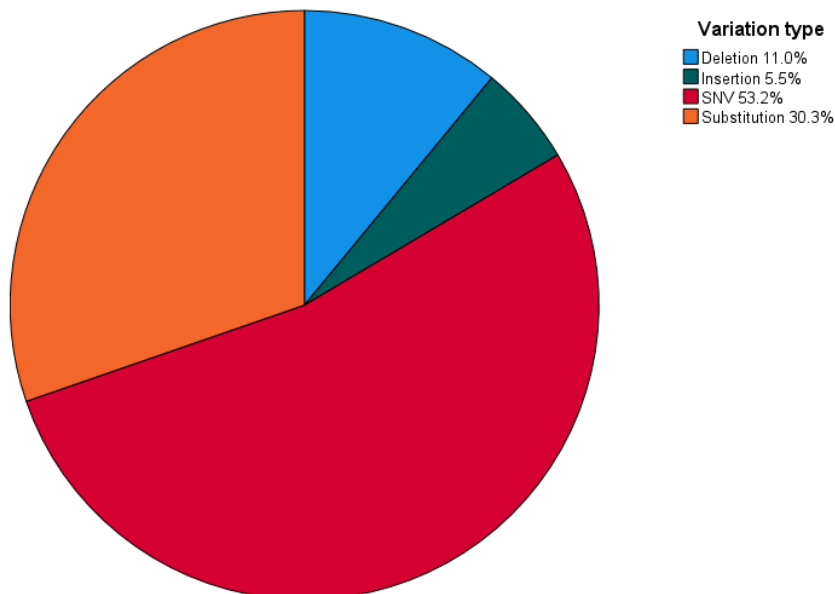

Figure S1B: Classification of called variants in cfDNA according to variation type

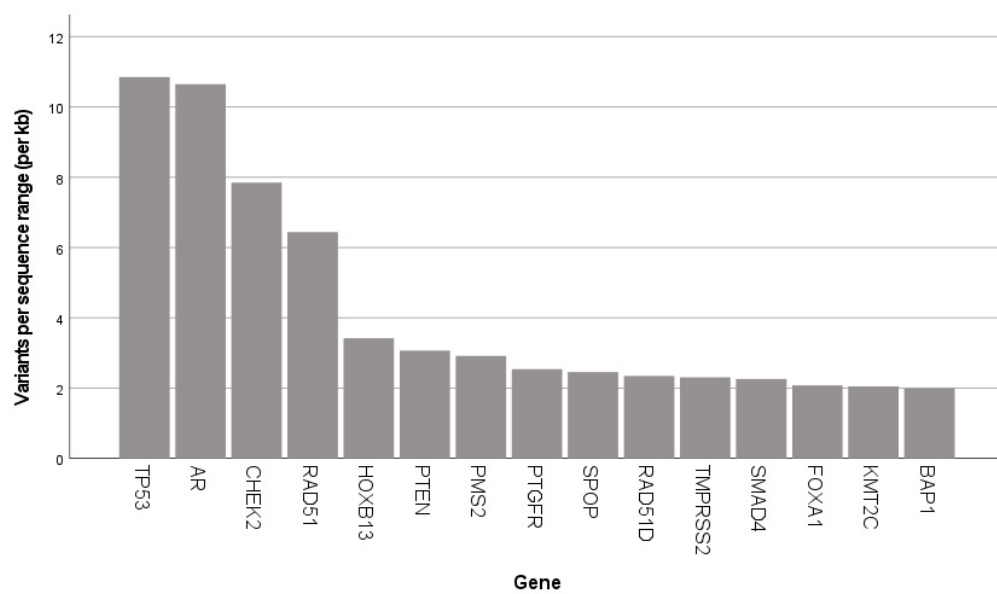

Figure S2: Frequency of pathogenic and likely pathogenic variants per sequence range for the top 15 genes
